# Supplementary material for: Development of the Canadian COVID-19 Emergency Department Rapid Response Network population-based registry: a methodology study
Source: PubMed Central journal article supplement — CMAJ Open. 2021 Mar 16;9(1):E261–70. doi: 10.9778/cmajo.20200290 (PMC8096396; doi:10.9778/cmajo.20200290), 2021-03-16
Supplement: supp_9.1.E261_2020-0290-1-at.pdf [file supp_9.1.E261_2020-0290-1-at.pdf]

## Appendix 1 (as supplied by the authors): Supplementary table

Table A1. Contributing Study Sites and Investigators

| Provincial Representative |                           | Study Sites                                                                   |                        |                      |
|---------------------------|---------------------------|-------------------------------------------------------------------------------|------------------------|----------------------|
| Lead Investigator         | Lead Research Coordinator | Contributing Site / Code                                                      | Site Type              | Member Investigators |
| <b>Maritime</b>           |                           |                                                                               |                        |                      |
| Patrick Fok               |                           |                                                                               |                        |                      |
| <b>Nova Scotia</b>        |                           |                                                                               |                        |                      |
| Hana Wiemer               | Corinne DeMone            | Halifax Infirmary/ 902                                                        | Urban, Teaching        | Patrick Fok          |
|                           |                           | Dartmouth General Hospital/ 903                                               | Urban,<br>Non-teaching | Hana Wiemer          |
|                           |                           | Hants Community Hospital/ 904                                                 | Rural, Non-teaching    | Samuel Campbell      |
|                           |                           | Cobequid Community Health Centre/ 905                                         | Rural, Non-teaching    | Kory Arsenault       |
| <b>New Brunswick</b>      |                           |                                                                               |                        |                      |
| Kavish Chandra            | Jacqueline Fraser         | Saint John Regional Hospital/ 901                                             | Urban, Teaching        | Kavish Chandra       |
| <b>Quebec</b>             |                           |                                                                               |                        |                      |
| Patrick Archambault       | Véronique Gélinas         | Hotel-Dieu de Lévis/ 701                                                      | Urban, Non-teaching    | Patrick Archambault  |
|                           |                           | Jewish General Hospital/ 702                                                  | Urban, Teaching        | Joel Turner          |
|                           |                           | Centre Hospitalier de l'Université Laval (CHU de Québec)/ 703                 | Urban, Teaching        | Éric Mercier         |
|                           |                           | L'hôpital Royal Victoria - Royal Victoria Hospital/ 705                       | Urban, Teaching        | Greg Clark           |
|                           |                           | Hôpital de l'Enfant-Jésus, CHU de Québec/ 706                                 | Urban, Teaching        | Éric Mercier         |
|                           |                           | Hôpital du Saint-Sacrement, CHU de Québec/ 707                                | Urban, Teaching        | Éric Mercier         |
|                           |                           | Hôpital Saint-François d'Assise, CHU de Québec/ 708                           | Urban, Teaching        | Éric Mercier         |
|                           |                           | Hôtel-Dieu de Québec, CHU de Québec/ 709                                      | Urban, Teaching        | Éric Mercier         |
|                           |                           | IUCPQ: Institut universitaire de cardiologie et de pneumologie de Québec/ 710 | Urban, Teaching        | Sébastien Robert     |
|                           |                           | Hôpital du Sacré-Coeur de Montreal/ 711                                       | Urban, Teaching        | Raoul Daoust         |
|                           |                           | Montreal General Hospital (MUHC)/ 712                                         | Urban, Teaching        | Greg Clark           |

Appendix to: Hohl CM, Rosychuk RJ, McRae AD, et al. Development of the Canadian COVID-19 Emergency Department Rapid Response Network population-based registry: a methodology study. *CMAJ Open* 2021. DOI:10.9778/cmajo.20200290. Copyright © 2021 The Author(s) or their employer(s).

To receive this resource in an accessible format, please contact us at [cmajgroup@cmaj.ca](mailto:cmajgroup@cmaj.ca).

| <b>Ontario</b>                    |                   |                                                                      |                                 |                                 |
|-----------------------------------|-------------------|----------------------------------------------------------------------|---------------------------------|---------------------------------|
| Laurie Morrison and Steven Brooks | Lindsay O'Donnell | Sunnybrook/ 401                                                      | Urban, Teaching                 | Ivy Cheng                       |
|                                   |                   | The Ottawa Hospital - Civic Campus/ 403                              | Urban, Teaching Urban, Teaching | Krishan Yadav                   |
|                                   |                   | The Ottawa Hospital - General Campus/ 404                            | Urban, Teaching                 | Krishan Yadav                   |
|                                   |                   | Kingston General Hospital/ 406                                       | Urban, Teaching                 | Steven Brooks                   |
|                                   |                   | Hamilton General Hospital & Juravinski Hospital/ 407                 | Urban, Teaching                 | Michelle Welsford               |
|                                   |                   | Health Science North, Sudbury Ontario/ 408                           | Urban, Non-teaching             | Rob Ohle                        |
|                                   |                   | London Health Sciences Centre (University & Victoria Hospitals)/ 409 | Urban, Teaching                 | Justin Yan                      |
|                                   |                   | North York General Hospital, Toronto/ 410                            | Urban, Non-teaching             | Rohit Mohindra                  |
|                                   |                   | Hotel Dieu Hospital, Kingston/ 415                                   | Urban, Teaching                 | Steven Brooks                   |
|                                   |                   | Toronto Western Hospital/ 414                                        | Urban, Teaching                 | Megan Landes                    |
| <b>Saskatchewan</b>               |                   |                                                                      |                                 |                                 |
| Phil Davis                        | Aimee Goss        | Pasqua Hospital, Regina/ 301                                         | Urban, Teaching                 | Ankit Kapur                     |
|                                   |                   | Regina General Hospital, Regina/ 302                                 | Urban, Teaching                 | Ankit Kapur                     |
|                                   |                   | St Paul's Hospital, Saskatoon/ 303                                   | Urban, Teaching                 | Phil Davis                      |
|                                   |                   | Royal University, Saskatoon/ 304                                     | Urban, Teaching                 | Phil Davis                      |
|                                   |                   | Saskatoon City Hospital, Saskatoon/ 305                              | Urban, Teaching                 | Phil Davis                      |
| <b>Alberta</b>                    |                   |                                                                      |                                 |                                 |
| Andrew McRae                      | Hina Walia        | University of Alberta Hospital, Edmonton/ 201                        | Urban, Teaching                 | Brian Rowe                      |
|                                   |                   | Foothills, Calgary/ 202                                              | Urban, Teaching                 | Andrew McRae                    |
|                                   |                   | Rockyview, Calgary/ 203                                              | Urban, Teaching                 |                                 |
|                                   |                   | Peter Lougheed Centre/ 204                                           | Urban, Teaching                 | Andrew McRae                    |
|                                   |                   | South Campus, Calgary/ 205                                           | Urban, Teaching                 | Andrew McRae                    |
|                                   |                   | Northeast Community Health Centre, Edmonton/ 206                     | Urban, Non-teaching             | Andrew McRae                    |
|                                   |                   | Royal Alexandra Hospital, Edmonton/ 306                              | Urban, Teaching                 | Jake Hayward, Jaspreet Khangura |

Appendix to: Hohl CM, Rosychuk RJ, McRae AD, et al. Development of the Canadian COVID-19 Emergency Department Rapid Response Network population-based registry: a methodology study. *CMAJ Open* 2021. DOI:10.9778/cmajo.20200290. Copyright © 2021 The Author(s) or their employer(s).

To receive this resource in an accessible format, please contact us at [cmajgroup@cmaj.ca](mailto:cmajgroup@cmaj.ca).

| <b>British Columbia</b> |            |                                   |                        |                              |
|-------------------------|------------|-----------------------------------|------------------------|------------------------------|
| Corinne Hohl            | Rajan Bola | Vancouver General Hospital/ 101   | Urban, Teaching        | Daniel Ting                  |
|                         |            | Lions Gate Hospital/ 102          | Urban,<br>Non-teaching | Maja Stachura                |
|                         |            | Saint Paul's Hospital/ 103        | Urban, Teaching        | Frank Scheuermeyer           |
|                         |            | Mount St Joseph's/ 104            | Urban,<br>Non-teaching | Frank Scheuermeyer           |
|                         |            | Surrey Memorial Hospital/ 105     | Urban, Teaching        | Balijeet Braar/ Craig Murray |
|                         |            | Royal Columbian Hospital/ 106     | Urban, Teaching        | John Taylor                  |
|                         |            | Abbotsford Regional Hospital/ 107 | Rural,<br>Non-teaching | Ian Martin                   |
|                         |            | Eagle Ridge Hospital/ 108         | Urban,<br>Non-teaching | Sean Wormsbecker             |
|                         |            | Royal Inland Hospital/ 112        | Urban,<br>Non-teaching | Ian Martin                   |
|                         |            | Kelowna General / Hospital/ 115   | Urban,<br>Teaching     | Lee Graham                   |

It was not possible for us to recruit Members from Newfoundland and Labrador, Northwest Territories, Nunavut, Prince Edward Island and Yukon at the time of the inception of the registry.
