# Supplementary material for: Development of the Canadian COVID-19 Emergency Department Rapid Response Network population-based registry: a methodology study
Source: PubMed Central journal article supplement — CMAJ Open. 2021 Mar 16;9(1):E261–70. doi: 10.9778/cmajo.20200290 (PMC8096396; doi:10.9778/cmajo.20200290), 2021-03-16
Supplement: supp_9.1.E261_2020-0290-3-at.pdf [file supp_9.1.E261_2020-0290-3-at.pdf]

# Appendix 3 (as supplied by the authors): Supplementary information

## Prospective data collection sheet

CCEDRRN

Patient Study ID \_\_\_\_\_

Prospective Data Collection Form

[Affix Patient Chart Label Here]

Complete for patients swabbed for COVID, OR patients presenting after a positive test and COVID symptoms

|                                                                                                                                                                                                                                                                                                                                                                                                                                                                                                                                                                                                                                                                                                                                                                                                                                                                                                                                                                                                                                                                                                     |  |                                                                                                                                                                                                                                                                                                                                                                                                                                                                                                                                                                                                                                                                                                        |
|-----------------------------------------------------------------------------------------------------------------------------------------------------------------------------------------------------------------------------------------------------------------------------------------------------------------------------------------------------------------------------------------------------------------------------------------------------------------------------------------------------------------------------------------------------------------------------------------------------------------------------------------------------------------------------------------------------------------------------------------------------------------------------------------------------------------------------------------------------------------------------------------------------------------------------------------------------------------------------------------------------------------------------------------------------------------------------------------------------|--|--------------------------------------------------------------------------------------------------------------------------------------------------------------------------------------------------------------------------------------------------------------------------------------------------------------------------------------------------------------------------------------------------------------------------------------------------------------------------------------------------------------------------------------------------------------------------------------------------------------------------------------------------------------------------------------------------------|
| <b>Hospital:</b> _____ <b>Arrival Time(hh:mm)_____:</b> _____                                                                                                                                                                                                                                                                                                                                                                                                                                                                                                                                                                                                                                                                                                                                                                                                                                                                                                                                                                                                                                       |  |                                                                                                                                                                                                                                                                                                                                                                                                                                                                                                                                                                                                                                                                                                        |
| <b>Your Name:</b> _____<br><input type="checkbox"/> Physician <input type="checkbox"/> Nurse                                                                                                                                                                                                                                                                                                                                                                                                                                                                                                                                                                                                                                                                                                                                                                                                                                                                                                                                                                                                        |  |                                                                                                                                                                                                                                                                                                                                                                                                                                                                                                                                                                                                                                                                                                        |
| <b>PATIENT CHARACTERISTICS</b><br><b>Arrival from:</b><br><input type="checkbox"/> Home <input type="checkbox"/> Long-term care/rehab<br><input type="checkbox"/> Shelter <input type="checkbox"/> Single room occupancy<br><input type="checkbox"/> No fixed address <input type="checkbox"/> Inter-hospital transfer<br><input type="checkbox"/> Other _____                                                                                                                                                                                                                                                                                                                                                                                                                                                                                                                                                                                                                                                                                                                                      |  | <b>EMS INFORMATION</b><br><b>Maximum oxygen delivered by EMS:</b> _____<br><b>Mode of oxygen delivery by EMS:</b><br><input type="checkbox"/> Nasal prongs <input type="checkbox"/> Simple rebreather <input type="checkbox"/> BiPAP<br><input type="checkbox"/> Facemask <input type="checkbox"/> Non-rebreather <input type="checkbox"/> CPAP                                                                                                                                                                                                                                                                                                                                                        |
| <b>HISTORY</b><br><b>Date of First Symptoms:</b> _____<br>(YYYY-MM-DD)<br><b>Symptoms (check all that apply):</b><br><input type="checkbox"/> Cough<br><input type="checkbox"/> Shortness of breath<br><input type="checkbox"/> Fever<br><input type="checkbox"/> Headache<br><input type="checkbox"/> Nausea/Vomiting<br><input type="checkbox"/> Diarrhea<br><input type="checkbox"/> Myalgias<br><input type="checkbox"/> Dysguesia/Anosmia                                                                                                                                                                                                                                                                                                                                                                                                                                                                                                                                                                                                                                                      |  | <b>COVID Swab administered Prior to ED Arrival within 14 days:</b><br><input type="checkbox"/> Yes <input type="checkbox"/> No <input type="checkbox"/> Unknown<br><b>Results of Prior COVID Testing:</b><br><input type="checkbox"/> Positive <input type="checkbox"/> Negative <input type="checkbox"/> Indeterminate <input type="checkbox"/> Unknown<br><b>Risk for Infection (check all that apply):</b><br><input type="checkbox"/> Travel from country with known cases within 14d<br><input type="checkbox"/> Institutional exposure: _____<br><input type="checkbox"/> Healthcare worker<br><input type="checkbox"/> Microbiology lab<br><input type="checkbox"/> Household/caregiver contact |
| <b>COMORBID CONDITIONS</b><br><input type="checkbox"/> Congestive heart failure <input type="checkbox"/> Coronary artery disease <input type="checkbox"/> Hypertension<br><input type="checkbox"/> Asthma <input type="checkbox"/> Pulmonary fibrosis <input type="checkbox"/> Chronic lung disease (not asthma/IPF)<br><input type="checkbox"/> Chronic kidney disease <input type="checkbox"/> Dialysis <input type="checkbox"/> Diabetes<br><input type="checkbox"/> Mild liver disease <input type="checkbox"/> Moderate/severe liver disease <input type="checkbox"/> Organ transplant<br><input type="checkbox"/> Chronic neuro disorder (not dementia) <input type="checkbox"/> Dementia <input type="checkbox"/> Rheumatologic disorder<br><input type="checkbox"/> Active malignant neoplasm <input type="checkbox"/> Past malignant neoplasm <input type="checkbox"/> Obesity (clinical impression)                                                                                                                                                                                       |  |                                                                                                                                                                                                                                                                                                                                                                                                                                                                                                                                                                                                                                                                                                        |
| <b>ED PROVIDER IMPRESSION: Is the patient in respiratory distress?</b> <input type="checkbox"/> Yes <input type="checkbox"/> No <input type="checkbox"/> Unknown                                                                                                                                                                                                                                                                                                                                                                                                                                                                                                                                                                                                                                                                                                                                                                                                                                                                                                                                    |  |                                                                                                                                                                                                                                                                                                                                                                                                                                                                                                                                                                                                                                                                                                        |
| <b>OTHER RISK FACTORS</b><br><b>ACE Inhibitors:</b> <input type="checkbox"/> Yes <input type="checkbox"/> No <input type="checkbox"/> Unknown <b>Tobacco Smoking:</b> <input type="checkbox"/> Never <input type="checkbox"/> Past <input type="checkbox"/> Current<br><b>ACE Receptor Blocker:</b> <input type="checkbox"/> Yes <input type="checkbox"/> No <input type="checkbox"/> Unknown <b>Vaping:</b> <input type="checkbox"/> Never <input type="checkbox"/> Past <input type="checkbox"/> Current<br><b>Non-ACEI/ Non-ARB</b> <input type="checkbox"/> Yes <input type="checkbox"/> No <input type="checkbox"/> Unknown <b>Alcohol Misuse:</b> <input type="checkbox"/> Never <input type="checkbox"/> Past <input type="checkbox"/> Current<br><b>Antihypertensives:</b> <b>Illicit Substance Use:</b> <input type="checkbox"/> Never <input type="checkbox"/> Past <input type="checkbox"/> Current<br>Describe illicit substance use:<br><b>NSAIDs:</b> _____<br><input type="checkbox"/> Reg <input type="checkbox"/> Prn <input type="checkbox"/> No <input type="checkbox"/> Unknown |  |                                                                                                                                                                                                                                                                                                                                                                                                                                                                                                                                                                                                                                                                                                        |
